# Supplementary material
Source: PubMed Central journal article supplement (PMC5822747)
Supplement: NIHMS928449-supplement-Supplemental_Material.pdf [file NIHMS928449-supplement-Supplemental_Material.pdf]

## **SUPPLEMENTAL MATERIAL**

**Supplemental Methods.** VIRGO Presenting Symptoms/Perceived Risk Interview Questions

**Supplemental Table 1.** Symptom Presentation by Sex and Symptom Duration

**Supplemental Table 2.** Symptom Presentation by Sex and Prior Coronary Artery Disease

**Supplemental Table 3.** Symptom Presentation by Sex and Diabetes Status

**Supplemental Table 4.** Patient Response to Symptoms by Sex and Symptom Duration

**Supplemental Table 5.** Patient Response to Symptoms by Sex and Prior Coronary Artery Disease

**Supplemental Table 6.** Patient Response to Symptoms by Sex and Education

**Supplemental Table 7.** Patient Response to Symptoms by Sex and Diabetes Status

**Supplemental Methods. VIRGO Presenting Symptoms/Perceived Risk Interview Questions**

1. What symptoms were you having before you came to the hospital? **[Check all that apply.]**

- Chest pain, pressure, tightness or discomfort
- Dizziness
- Indigestion or stomach pain, pressure, burning or discomfort
- Nausea
- Pain or discomfort in jaw, neck, arms or between your shoulder blades
- Palpitations
- Shortness of breath
- Sweating
- Weakness or fatigue
- Confusion
- Other symptom \_\_\_\_\_

2. Why did you decide to get help for these symptoms? **[Check all that apply.]**

- Symptoms would not go away
- Pain too bad to ignore
- Worried about heart problem
- Worried about other health problems (e.g., diabetes)
- Family / friend told me to get help
- Other \_\_\_\_\_

3. When you were first having these symptoms, did you think that something was wrong with your heart?

- Yes       No       Don't Know

**[If No]** What did you think was causing these symptoms? **[Check all that apply]**

- Indigestion or acid reflux
- Stomach illness or flu
- Muscle pain
- Fatigue
- Stress / anxiety
- Asthma
- Diabetes
- Other cause \_\_\_\_\_

4. Were you having any of these symptoms (or not feeling well) for more than a day prior to seeking medical care?

- Yes       No

**[If Yes]** How long were you having these symptoms (or not feeling well)?

\_\_\_ (days) \_\_\_ (months)

What were the reason(s) that you decided to wait before seeking medical care?  
**[Check all that apply.]**

- Didn't have time to go to the doctor
- Symptoms did not seem bad enough for emergency care
- Symptoms would come and go over time (not persistent)
- Symptoms were different than expected for a heart problem
- Took medication for symptoms (e.g., antacids, over the counter meds)
- Transportation – waited for someone to drive me to office/hospital
- Health insurance concerns
- Embarrassment or fear
- Other \_\_\_\_\_
- Don't know

5. Did you visit your doctor for any of these symptoms before this hospitalization?

- Yes
- You never had these symptoms before
- You never visited your doctor for these symptoms
- Don't know

**[If Yes]** How many times have you seen your doctor for these symptoms?

\_\_\_\_\_  Don't Know

Did you see your doctor in the week before going to the hospital for any of these symptoms?

- Yes
- No
- Don't Know

Did your doctor ever tell you that your symptoms might be related to a heart problem?

- Yes
- No
- Don't Know

**[If No]** What did they think caused these symptoms?

- Indigestion or acid reflux
- Stomach illness or flu
- Muscle pain
- Fatigue
- Stress / anxiety
- Asthma
- Diabetes
- Other cause \_\_\_\_\_

Were you tested for a heart problem (e.g., ECG, stress test)?

Yes    No    Don't Know

**[If Yes]** Did the tests show that you were having a problem with your heart?

Yes    No    Don't Know

6. Where did you first go for help? **[Check all that apply.]**

- Went directly to the Emergency Room (ER)
- Called 9-1-1
- Went to my primary health care provider
- Went to a walk-in clinic
- Other \_\_\_\_\_

7. When you first went for help, did the health care providers think that you were having a problem with your heart?

Yes    No

**[If No]** What did they think was wrong?

- Acid reflux
- Stomach illness or flu
- Asthma
- Other chronic condition (i.e. diabetes)
- Other \_\_\_\_\_

8. When you got to the hospital, did you think you waited a long time before you were seen by a doctor?

Yes    No

**[If Yes]** Roughly how long did you wait? \_\_\_\_\_ hours   \_\_\_\_\_ minutes

What were the reasons you waited? **[Check all that apply.]**

- Triage nurse / care provider did not think symptoms were urgent
- The emergency room was crowded
- Other people were seen ahead of me
- Waited for tests or results
- There were not any beds – waited to be transferred to a floor in the hospital
- Other \_\_\_\_\_

9. Did you take aspirin before seeking medical attention?

Yes    No    Don't Remember    Don't Know

**[If No]** Why didn't you take aspirin?

- Aspirin was not available at the time
- Allergic to aspirin
- Did not know that I should take aspirin
- Other (specify) \_\_\_\_\_
- Don't know

10. Prior to your recent hospital stay, did you consider yourself at risk for heart disease or a heart problem?

Yes    No

11. Prior to your recent hospital stay, did any of your healthcare providers ever tell you that you were at risk for heart disease or a heart problem?

Yes    No    Don't Know

12. Did a doctor ever talk to you about heart disease and talk about things that you could do to take care of your heart?

Yes    No    Don't Know

**Supplemental Table 1. Symptom Presentation by Sex and Symptom Duration**

|                                                                                          | Among Patients with     |                |            | Among Patients with     |                |            |
|------------------------------------------------------------------------------------------|-------------------------|----------------|------------|-------------------------|----------------|------------|
|                                                                                          | Symptom Duration >1 Day |                |            | Symptom Duration ≤1 Day |                |            |
|                                                                                          | Women<br>(n=1099)       | Men<br>(n=477) | <i>p</i> * | Women<br>(n=910)        | Men<br>(n=499) | <i>p</i> * |
| <b>Individual Symptoms, %</b>                                                            |                         |                |            |                         |                |            |
| Chest pain, pressure, tightness,<br>or discomfort                                        | 87.3                    | 89.3           | 1          | 86.7                    | 89.8           | 0.550      |
| Dizziness                                                                                | 29.4                    | 28.1           | 1          | 26.3                    | 24.5           | 1          |
| Epigastric: indigestion, nausea, or<br>stomach pain, pressure, burning,<br>or discomfort | 62.8                    | 50.3           | <0.001     | 60.0                    | 50.1           | 0.003      |
| Pain/discomfort in jaw, neck,<br>arms, or between shoulder blades                        | 67.8                    | 59.5           | 0.013      | 61.5                    | 56.6           | 0.524      |
| Palpitations                                                                             | 20.4                    | 14.7           | 0.053      | 16.6                    | 10.4           | 0.013      |
| Shortness of breath                                                                      | 56.6                    | 50.5           | 0.157      | 48.3                    | 44.8           | 0.826      |
| Sweating                                                                                 | 51.0                    | 52.2           | 1          | 56.1                    | 58.6           | 1          |
| Weakness or fatigue                                                                      | 48.2                    | 45.1           | 1          | 41.5                    | 36.9           | 0.550      |
| Confusion                                                                                | 13.4                    | 11.5           | 1          | 10.6                    | 10.8           | 1          |
| <b>Number of Associated, Non-<br/>Chest Pain Symptoms</b>                                |                         |                |            |                         |                |            |
| Mean (SD)                                                                                | 3.5 (2.0)               | 3.1 (1.9)      | <0.001     | 3.2 (2.0)               | 2.9 (1.9)      | 0.009      |
| Median (IQR)                                                                             | 3 (2-5)                 | 3 (2-4)        | <0.001     | 3 (2-5)                 | 3 (2-4)        | 0.009      |
| 0 symptoms                                                                               | 3.9                     | 6.1            | 0.009      | 7.7                     | 7.2            | 0.006      |

---

|              |      |      |      |      |
|--------------|------|------|------|------|
| 1-2 symptoms | 31.8 | 37.1 | 33.2 | 39.9 |
| 3-4 symptoms | 33.5 | 32.9 | 32.3 | 33.9 |
| >4 symptoms  | 30.8 | 23.9 | 26.8 | 19.0 |

---

Abbreviations: IQR, interquartile range; SD, standard deviation.

\*The stepdown Bonferroni method was used to adjust the p values for multiple pairwise comparisons.

**Supplemental Table 2. Symptom Presentation by Sex and Prior Coronary Artery Disease\***

|                                                                                          | Among Patients with |                |                       | Among Patients with |                |                       |
|------------------------------------------------------------------------------------------|---------------------|----------------|-----------------------|---------------------|----------------|-----------------------|
|                                                                                          | Prior CAD           |                |                       | No Prior CAD        |                |                       |
|                                                                                          | Women<br>(n=625)    | Men<br>(n=294) | <i>p</i> <sup>†</sup> | Women<br>(n=1384)   | Men<br>(n=682) | <i>p</i> <sup>†</sup> |
| <b>Individual Symptoms, %</b>                                                            |                     |                |                       |                     |                |                       |
| Chest pain, pressure, tightness,<br>or discomfort                                        | 87.8                | 90.1           | 1                     | 86.6                | 89.3           | 0.426                 |
| Dizziness                                                                                | 31.8                | 27.6           | 1                     | 26.2                | 25.7           | 1                     |
| Epigastric: indigestion, nausea, or<br>stomach pain, pressure, burning,<br>or discomfort | 63.0                | 56.8           | 0.494                 | 60.8                | 47.4           | <0.001                |
| Pain/discomfort in jaw, neck,<br>arms, or between shoulder blades                        | 66.6                | 63.1           | 1                     | 64.2                | 55.9           | 0.002                 |
| Palpitations                                                                             | 22.9                | 16.7           | 0.260                 | 16.8                | 10.7           | 0.002                 |
| Shortness of breath                                                                      | 61.9                | 50.5           | 0.010                 | 48.7                | 46.3           | 1                     |
| Sweating                                                                                 | 53.6                | 55.3           | 1                     | 53.1                | 55.6           | 1                     |
| Weakness or fatigue                                                                      | 47.5                | 44.7           | 1                     | 44.1                | 39.3           | 0.225                 |
| Confusion                                                                                | 14.6                | 11.9           | 1                     | 11.0                | 10.9           | 1                     |
| <b>Number of Associated, Non-<br/>Chest Pain Symptoms</b>                                |                     |                |                       |                     |                |                       |
| Mean (SD)                                                                                | 3.6 (2.1)           | 3.3 (1.9)      | 0.013                 | 3.2 (1.9)           | 2.9 (1.9)      | <0.001                |
| Median (IQR)                                                                             | 4 (2-5)             | 3 (2-4)        | 0.011                 | 3 (2-5)             | 3 (1-4)        | <0.001                |
| 0 symptoms                                                                               | 5.6                 | 4.4            | 0.005                 | 5.6                 | 7.6            | 0.004                 |



---

|              |      |      |      |      |
|--------------|------|------|------|------|
| 1-2 symptoms | 27.8 | 37.8 | 34.5 | 38.9 |
| 3-4 symptoms | 32.2 | 33.0 | 33.3 | 33.6 |
| >4 symptoms  | 34.4 | 24.8 | 26.5 | 19.9 |

---

Abbreviations: CAD, coronary artery disease; IQR, interquartile range; SD, standard deviation.

\*Coronary artery disease includes a history of myocardial infarction, percutaneous coronary intervention, coronary artery bypass grafting, or angina.

†The stepdown Bonferroni method was used to adjust the p values for multiple pairwise comparisons.

**Supplemental Table 3. Symptom Presentation by Sex and Diabetes Status**

|                                                                                          | Among Patients with |                |            | Among Patients    |                |            |
|------------------------------------------------------------------------------------------|---------------------|----------------|------------|-------------------|----------------|------------|
|                                                                                          | Diabetes            |                |            | Without Diabetes  |                |            |
|                                                                                          | Women<br>(n=699)    | Men<br>(n=206) | <i>p</i> * | Women<br>(n=1310) | Men<br>(n=770) | <i>p</i> * |
| <b>Individual Symptoms, %</b>                                                            |                     |                |            |                   |                |            |
| Chest pain, pressure, tightness,<br>or discomfort                                        | 85.3                | 85.9           | 1          | 87.9              | 90.5           | 0.282      |
| Dizziness                                                                                | 26.4                | 24.4           | 1          | 28.9              | 26.8           | 0.665      |
| Epigastric: indigestion, nausea, or<br>stomach pain, pressure, burning,<br>or discomfort | 60.9                | 48.5           | 0.014      | 61.8              | 50.6           | <0.001     |
| Pain/discomfort in jaw, neck,<br>arms, or between shoulder blades                        | 62.5                | 62.4           | 1          | 66.3              | 56.9           | <0.001     |
| Palpitations                                                                             | 18.1                | 12.7           | 0.567      | 19.0              | 12.5           | <0.001     |
| Shortness of breath                                                                      | 54.9                | 54.1           | 1          | 51.8              | 45.8           | 0.055      |
| Sweating                                                                                 | 50.0                | 46.8           | 1          | 55.0              | 57.8           | 0.665      |
| Weakness or fatigue                                                                      | 44.8                | 44.9           | 1          | 45.3              | 39.9           | 0.075      |
| Confusion                                                                                | 13.3                | 11.2           | 1          | 11.5              | 11.2           | 0.845      |
| <b>Number of Associated, Non-<br/>Chest Pain Symptoms</b>                                |                     |                |            |                   |                |            |
| Mean (SD)                                                                                | 3.3 (2.0)           | 3.0 (1.9)      | 0.088      | 3.4 (2.0)         | 3.0 (1.9)      | <0.001     |
| Median (IQR)                                                                             | 3 (2-5)             | 3 (2-4)        | 0.094      | 3 (2-5)           | 3 (2-4)        | <0.001     |
| 0 symptoms                                                                               | 4.9                 | 6.8            | 0.317      | 6.0               | 6.6            | <0.001     |

---

|              |      |      |      |      |
|--------------|------|------|------|------|
| 1-2 symptoms | 34.3 | 35.9 | 31.5 | 39.2 |
| 3-4 symptoms | 34.2 | 36.4 | 32.3 | 32.6 |
| >4 symptoms  | 26.6 | 20.9 | 30.2 | 21.6 |

---

Abbreviations: IQR, interquartile range; SD, standard deviation.

\*The stepdown Bonferroni method was used to adjust the p values for multiple pairwise comparisons.

**Supplemental Table 4. Patient Response to Symptoms by Sex and Symptom Duration**

|                                                                          | Among Patients with<br>Symptom Duration >1 Day |         |            | Among Patients with<br>Symptom Duration ≤1 Day |         |            |
|--------------------------------------------------------------------------|------------------------------------------------|---------|------------|------------------------------------------------|---------|------------|
|                                                                          | Women                                          | Men     | <i>p</i> * | Women                                          | Men     | <i>p</i> * |
|                                                                          | (n=1099)                                       | (n=477) |            | (n=910)                                        | (n=499) |            |
| <b>Patient did not perceive cause of symptoms to be heart related, %</b> | 57.1                                           | 55.1    | 0.130      | 51.8                                           | 49.5    | 0.815      |
| Perceived reason                                                         |                                                |         |            |                                                |         |            |
| Indigestion or acid reflux                                               | 44.3                                           | 50.2    | 0.457      | 40.8                                           | 48.6    | 0.224      |
| Muscle pain                                                              | 16.4                                           | 23.2    | 0.119      | 14.0                                           | 19.0    | 0.239      |
| Stress / anxiety                                                         | 22.6                                           | 12.9    | 0.007      | 18.7                                           | 10.5    | 0.036      |
| Stomach illness or flu                                                   | 12.3                                           | 8.4     | 0.457      | 10.6                                           | 11.3    | 1          |
| Asthma                                                                   | 14.3                                           | 9.5     | 0.300      | 5.9                                            | 6.5     | 1          |
| Fatigue                                                                  | 8.1                                            | 5.3     | 0.457      | 3.0                                            | 6.1     | 0.224      |
| Diabetes                                                                 | 4.5                                            | 2.7     | 0.457      | 4.5                                            | 1.2     | 0.130      |
| Other cause                                                              | 4.9                                            | 4.6     | 0.812      | 14.2                                           | 8.1     | 0.118      |
| <b>Decision to seek medical care, %</b>                                  |                                                |         |            |                                                |         |            |
| Symptoms would not go away                                               | 67.5                                           | 64.8    | 0.866      | 60.7                                           | 60.1    | 1          |

|                                                         |                |                |       |               |               |       |
|---------------------------------------------------------|----------------|----------------|-------|---------------|---------------|-------|
| Pain too bad to ignore                                  | 62.6           | 59.1           | 0.766 | 56.3          | 53.5          | 1     |
| Worried about heart problem                             | 42.5           | 47.8           | 0.257 | 40.5          | 51.7          | 0.002 |
| Family / friend told me to get help                     | 26.8           | 29.4           | 0.866 | 24.6          | 23.6          | 1     |
| Worried about other health problems (e.g.,<br>diabetes) | 18.3           | 11.3           | 0.004 | 14.2          | 12.2          | 1     |
| Other                                                   | 1.3            | 0.8            | 0.866 | 0.9           | 0.2           | 1     |
| <b>Time to hospital presentation, %</b>                 |                |                |       |               |               |       |
| ≤2 hours                                                | 25.5           | 27.0           | 0.113 | 41.9          | 48.7          | 0.002 |
| >2-6 hours                                              | 12.0           | 14.7           |       | 19.1          | 22.2          |       |
| >6 hours                                                | 52.0           | 45.7           |       | 22.7          | 18.4          |       |
| Median time (IQR), hours                                | 8.7 (1.0-46.4) | 5.5 (1.0-36.0) | 0.070 | 1.7 (0.5-7.9) | 1.6 (0.6-4.8) | 0.286 |

Abbreviations: CAD, coronary artery disease; IQR, interquartile range.

\*The stepdown Bonferroni method was used to adjust the p values for multiple pairwise comparisons.

**Supplemental Table 5. Patient Response to Symptoms by Sex and Prior Coronary Artery Disease\***

|                                                                          | Among Patients with |                |                       | Among Patients with |                |                       |
|--------------------------------------------------------------------------|---------------------|----------------|-----------------------|---------------------|----------------|-----------------------|
|                                                                          | Prior CAD           |                |                       | No Prior CAD        |                |                       |
|                                                                          | Women<br>(n=625)    | Men<br>(n=294) | <i>p</i> <sup>†</sup> | Women<br>(n=1384)   | Men<br>(n=682) | <i>p</i> <sup>†</sup> |
| <b>Patient did not perceive cause of symptoms to be heart related, %</b> | 39.7                | 36.7           | 0.417                 | 61.5                | 58.9           | 0.417                 |
| Perceived reason                                                         |                     |                |                       |                     |                |                       |
| Indigestion or acid reflux                                               | 39.1                | 50.9           | 0.268                 | 43.8                | 49.0           | 0.430                 |
| Muscle pain                                                              | 14.1                | 18.5           | 1                     | 15.7                | 21.9           | 0.049                 |
| Stress / anxiety                                                         | 23.4                | 10.2           | 0.030                 | 20.2                | 12.2           | 0.004                 |
| Stomach illness or flu                                                   | 13.7                | 7.4            | 0.541                 | 10.9                | 10.4           | 1                     |
| Asthma                                                                   | 9.7                 | 6.5            | 1                     | 11.0                | 8.5            | 0.632                 |
| Fatigue                                                                  | 6.9                 | 6.5            | 1                     | 5.6                 | 5.5            | 1                     |
| Diabetes                                                                 | 5.6                 | 4.6            | 1                     | 4.1                 | 1.2            | 0.049                 |
| Other cause                                                              | 8.5                 | 4.6            | 1                     | 9.0                 | 6.7            | 0.632                 |
| <b>Decision to seek medical care, %</b>                                  |                     |                |                       |                     |                |                       |
| Symptoms would not go away                                               | 64.2                | 62.6           | 0.748                 | 64.5                | 62.3           | 1                     |

|                                                      |                |                |        |                |                |        |
|------------------------------------------------------|----------------|----------------|--------|----------------|----------------|--------|
| Pain too bad to ignore                               | 60.5           | 57.5           | 0.748  | 59.4           | 55.7           | 0.854  |
| Worried about heart problem                          | 54.2           | 63.9           | 0.037  | 35.9           | 43.7           | 0.014  |
| Family / friend told me to get help                  | 22.7           | 23.8           | 0.748  | 27.2           | 27.6           | 1      |
| Worried about other health problems (e.g., diabetes) | 17.6           | 10.9           | 0.058  | 15.9           | 12.2           | 0.306  |
| Other                                                | 1.1            | 0.0            | 0.265  | 1.1            | 0.7            | 1      |
| <b>Time to hospital presentation, %</b>              |                |                |        |                |                |        |
| ≤2 hours                                             | 33.8           | 36.1           | 0.0498 | 32.5           | 39.0           | <0.001 |
| >2-6 hours                                           | 17.1           | 20.4           |        | 14.4           | 17.7           |        |
| >6 hours                                             | 36.8           | 27.9           |        | 39.6           | 33.4           |        |
| Median time (IQR), hours                             | 2.6 (0.7-19.1) | 2.4 (0.7-11.5) | 0.323  | 3.6 (0.8-22.2) | 2.4 (0.7-13.7) | 0.004  |

Abbreviations: CAD, coronary artery disease; IQR, interquartile range.

\*Coronary artery disease includes a history of myocardial infarction, percutaneous coronary intervention, coronary artery bypass grafting, or angina.

†The stepdown Bonferroni method was used to adjust the p values for multiple pairwise comparisons.

**Supplemental Table 6. Patient Response to Symptoms by Sex and Education**

|                                                                          | Among Patients with<br>>High School Education |         |            | Among Patients with<br>High School Education<br>or Below |         |            |
|--------------------------------------------------------------------------|-----------------------------------------------|---------|------------|----------------------------------------------------------|---------|------------|
|                                                                          | Women                                         | Men     | <i>p</i> * | Women                                                    | Men     | <i>p</i> * |
|                                                                          | (n=1132)                                      | (n=547) |            | (n=877)                                                  | (n=429) |            |
| <b>Patient did not perceive cause of symptoms to be heart related, %</b> | 55.8                                          | 52.7    | 0.417      | 53.2                                                     | 51.7    | 0.550      |
| Perceived reason                                                         |                                               |         |            |                                                          |         |            |
| Indigestion or acid reflux                                               | 41.1                                          | 46.5    | 0.502      | 45.0                                                     | 53.2    | 0.266      |
| Muscle pain                                                              | 16.9                                          | 24.3    | 0.055      | 13.3                                                     | 17.1    | 0.724      |
| Stress / anxiety                                                         | 21.0                                          | 12.5    | 0.015      | 20.8                                                     | 10.8    | 0.010      |
| Stomach illness or flu                                                   | 12.8                                          | 12.8    | 1          | 9.9                                                      | 5.9     | 0.400      |
| Asthma                                                                   | 10.9                                          | 7.3     | 0.430      | 10.5                                                     | 9.0     | 1          |
| Fatigue                                                                  | 6.2                                           | 6.6     | 1          | 5.6                                                      | 4.5     | 1          |
| Diabetes                                                                 | 4.3                                           | 2.4     | 0.509      | 4.7                                                      | 1.4     | 0.193      |
| Other cause                                                              | 9.7                                           | 4.5     | 0.055      | 7.9                                                      | 8.6     | 1          |
| <b>Decision to seek medical care, %</b>                                  |                                               |         |            |                                                          |         |            |



|                                                         |                |                |       |                |                |       |
|---------------------------------------------------------|----------------|----------------|-------|----------------|----------------|-------|
| Symptoms would not go away                              | 65.5           | 64.9           | 1     | 62.9           | 59.2           | 0.819 |
| Pain too bad to ignore                                  | 58.7           | 54.1           | 0.494 | 61.1           | 59.0           | 0.819 |
| Worried about heart problem                             | 42.8           | 53.0           | 0.002 | 40.1           | 45.7           | 0.326 |
| Family / friend told me to get help                     | 25.3           | 24.9           | 1     | 26.5           | 28.4           | 0.819 |
| Worried about other health problems (e.g.,<br>diabetes) | 16.9           | 10.4           | 0.009 | 15.8           | 13.5           | 0.819 |
| Other                                                   | 1.1            | 0.2            | 0.494 | 1.1            | 0.9            | 0.819 |
| <b>Time to hospital presentation, %</b>                 |                |                |       |                |                |       |
| ≤2 hours                                                | 35.0           | 39.3           | 0.039 | 30.2           | 36.6           | 0.006 |
| >2-6 hours                                              | 15.0           | 18.1           |       | 15.5           | 19.1           |       |
| >6 hours                                                | 37.1           | 31.8           |       | 40.8           | 31.7           |       |
| Median time (IQR), hours                                | 2.7 (0.7-19.7) | 2.3 (0.7-12.0) | 0.064 | 3.9 (0.8-23.7) | 2.6 (0.8-14.0) | 0.020 |

Abbreviations: IQR, interquartile range.

\*The stepdown Bonferroni method was used to adjust the p values for multiple pairwise comparisons.

**Supplemental Table 7. Patient Response to Symptoms by Sex and Diabetes Status**

|                                                                          | Among Patients with Diabetes |         |            | Among Patients Without Diabetes |         |            |
|--------------------------------------------------------------------------|------------------------------|---------|------------|---------------------------------|---------|------------|
|                                                                          | Women                        | Men     | <i>p</i> * | Women                           | Men     | <i>p</i> * |
|                                                                          | (n=699)                      | (n=206) |            | (n=1310)                        | (n=770) |            |
| <b>Patient did not perceive cause of symptoms to be heart related, %</b> | 57.5                         | 53.4    | 0.604      | 53.2                            | 51.9    | 0.519      |
| Perceived reason                                                         |                              |         |            |                                 |         |            |
| Indigestion or acid reflux                                               | 40.3                         | 52.7    | 0.137      | 44.2                            | 48.5    | 0.671      |
| Muscle pain                                                              | 12.2                         | 15.5    | 1          | 17.2                            | 22.8    | 0.176      |
| Stress / anxiety                                                         | 18.9                         | 8.2     | 0.059      | 22.1                            | 12.8    | <0.001     |
| Stomach illness or flu                                                   | 12.7                         | 10.9    | 1          | 10.9                            | 9.5     | 1          |
| Asthma                                                                   | 11.2                         | 10.9    | 1          | 10.5                            | 7.3     | 0.384      |
| Fatigue                                                                  | 5.5                          | 6.4     | 1          | 6.2                             | 5.5     | 1          |
| Diabetes                                                                 | 10.9                         | 7.3     | 1          | 0.7                             | 0.5     | 1          |
| Other cause                                                              | 9.0                          | 8.2     | 1          | 8.9                             | 5.8     | 0.364      |
| <b>Decision to seek medical care, %</b>                                  |                              |         |            |                                 |         |            |
| Symptoms would not go away                                               | 63.2                         | 65.5    | 1          | 65.0                            | 61.6    | 0.444      |
| Pain too bad to ignore                                                   | 59.1                         | 56.3    | 1          | 60.1                            | 56.2    | 0.429      |

|                                                         |                |                |       |                |                |        |
|---------------------------------------------------------|----------------|----------------|-------|----------------|----------------|--------|
| Worried about heart problem                             | 42.2           | 49.0           | 0.678 | 41.3           | 50.0           | <0.001 |
| Family / friend told me to get help                     | 26.3           | 22.8           | 1     | 25.5           | 27.4           | 0.467  |
| Worried about other health problems (e.g.,<br>diabetes) | 22.2           | 12.6           | 0.045 | 13.4           | 11.6           | 0.467  |
| Other                                                   | 0.9            | 0.5            | 1     | 1.2            | 0.5            | 0.444  |
| <b>Time to hospital presentation, %</b>                 |                |                |       |                |                |        |
| ≤2 hours                                                | 28.2           | 28.6           | 0.931 | 35.4           | 40.6           | <0.001 |
| >2-6 hours                                              | 15.6           | 16.0           |       | 15.0           | 19.2           |        |
| >6 hours                                                | 44.9           | 42.7           |       | 35.4           | 28.8           |        |
| Median time (IQR), hours                                | 4.9 (1.0-25.7) | 4.8 (0.9-34.2) | 0.935 | 2.6 (0.7-18.1) | 2.1 (0.7-10.0) | 0.016  |

Abbreviations: IQR, interquartile range.

\*The stepdown Bonferroni method was used to adjust the p values for multiple pairwise comparisons.
